# Supplementary material for: Novel Tetrahydroisoquinoline-Based Heterocyclic Compounds Efficiently Inhibit SARS-CoV-2 Infection In Vitro
Source: MDPI journal article supplement (doi:10.3390/v15020502), 2023-02-11
Supplement: s1 [file s1]

# Supplementary materials for

## Novel tetrahydroisoquinoline based heterocyclic compounds efficiently inhibit SARS-CoV-2 infection in vitro

Xi Wang <sup>1,†</sup>, Nikola T. Burdzhiev <sup>2,†</sup>, Hengrui Hu <sup>1</sup>, Yufeng Li <sup>1</sup>, Jiang Li <sup>1</sup>, Vesela V. Lozanova <sup>3</sup>,  
Meglena I. Kandinska <sup>2,\*</sup> and Manli Wang <sup>1,4,\*</sup>

<sup>1</sup> Center for Biosafety Mega-Science, Wuhan Institute of Virology, Chinese Academy of Sciences, 430071 Wuhan, China

<sup>2</sup> Sofia University "St. Kliment Ohridski", Faculty of Chemistry and Pharmacy, 1, James Bourchier avenue; 1164 Sofia, Bulgaria

<sup>3</sup> Department of Medical Chemistry and Biochemistry, Medical Faculty, Medical University-Sofia, 2 Zdrave Str., 1431 Sofia, Bulgaria

<sup>4</sup> Hubei Jiangxia Laboratory, 430071 Wuhan, China

\* Correspondence: [ohmk@chem.uni-sofia.bg](mailto:ohmk@chem.uni-sofia.bg) (M.I.K); [wangml@wh.iov.cn](mailto:wangml@wh.iov.cn) (M.W)

† These authors contributed equally to this work.

### Table of Contents

|                                                                                                                                                            |   |
|------------------------------------------------------------------------------------------------------------------------------------------------------------|---|
| Spectra of <i>tert-butyl rel-4-(((3R,4S)-3-(1H-indol-3-yl)-1-oxo-2-propyl-1,2,3,4-tetrahydroisoquinolin-4-yl)methyl)piperazine-1-carboxylate (1)</i> ..... | 2 |
| Spectra of <i>rel-(3R,4S)-3-(1H-indol-3-yl)-4-(piperazin-1-ylmethyl)-2-propyl-3,4-dihydroisoquinolin-1(2H)-one (2)</i> .....                               | 4 |
| General structure of compounds <i>trans-3 - trans-9</i> .....                                                                                              | 6 |

Spectra of *tert*-butyl *rel*-4-(((3*R*,4*S*)-3-(1*H*-indol-3-yl)-1-oxo-2-propyl-1,2,3,4-tetrahydroisoquinolin-4-yl)methyl)piperazine-1-carboxylate (**1**)

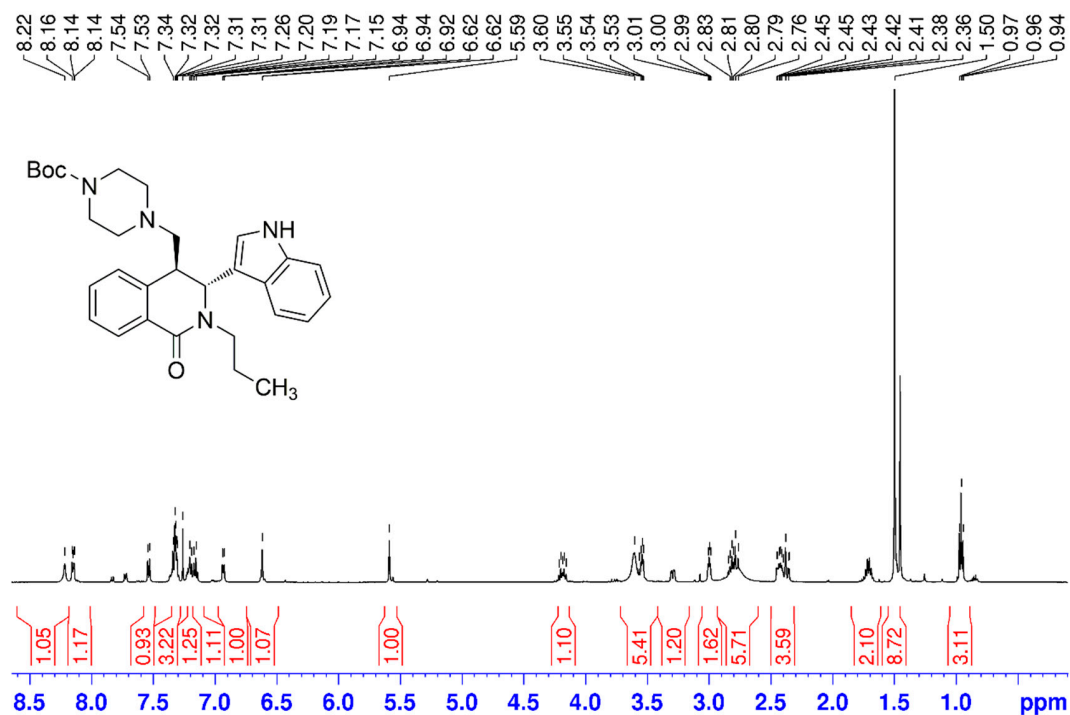

Figure S1. <sup>1</sup>H NMR (DMSO-*d*<sub>6</sub>) of compound *trans*-**1** at 298 K.

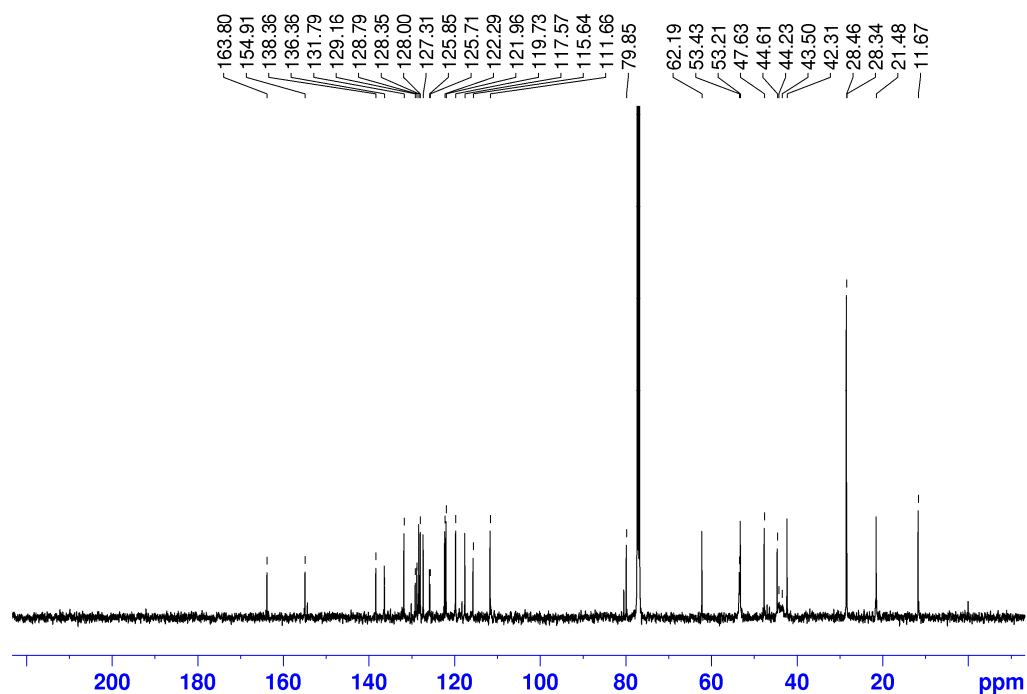

Figure S2. <sup>13</sup>C NMR (DMSO-*d*<sub>6</sub>) of compound *trans*-**1** at 298 K.

RT: 0.00 - 16.02

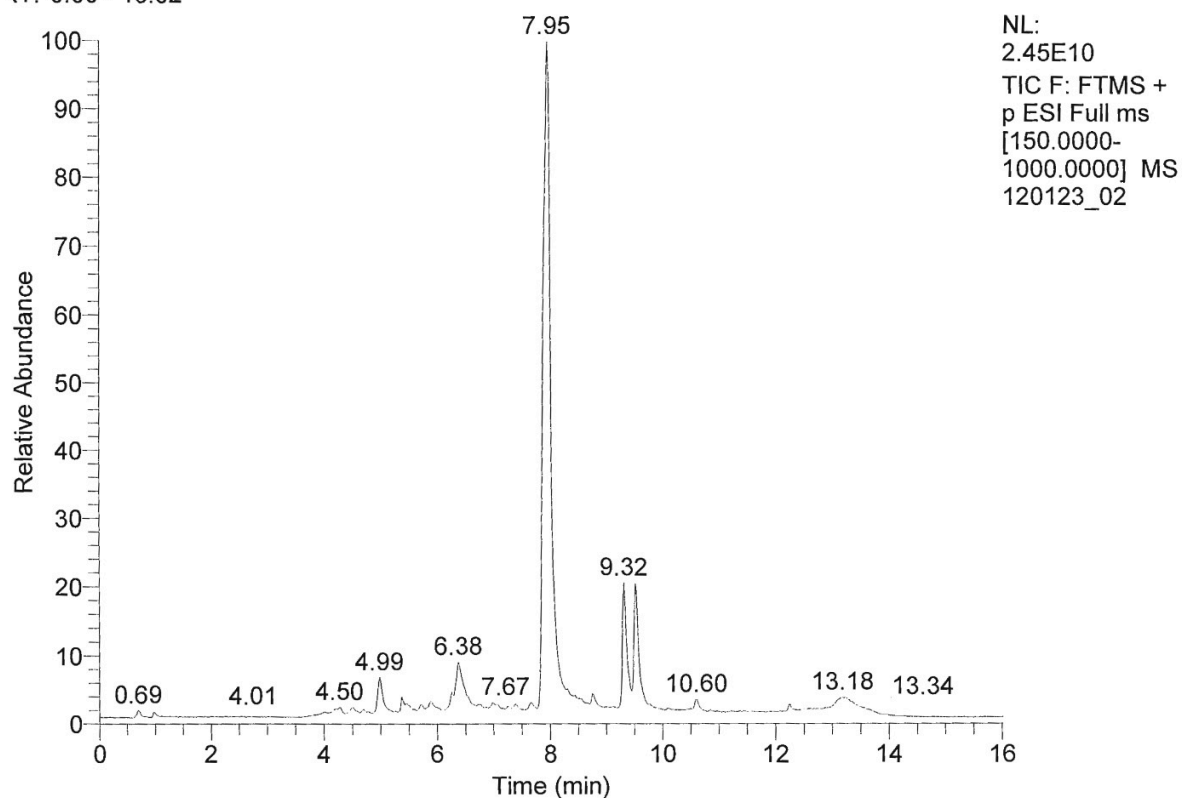

120123\_02 #593 RT: 7.93 AV: 1 NL: 1.28E10

T: FTMS + p ESI Full ms [150.0000-1000.0000]

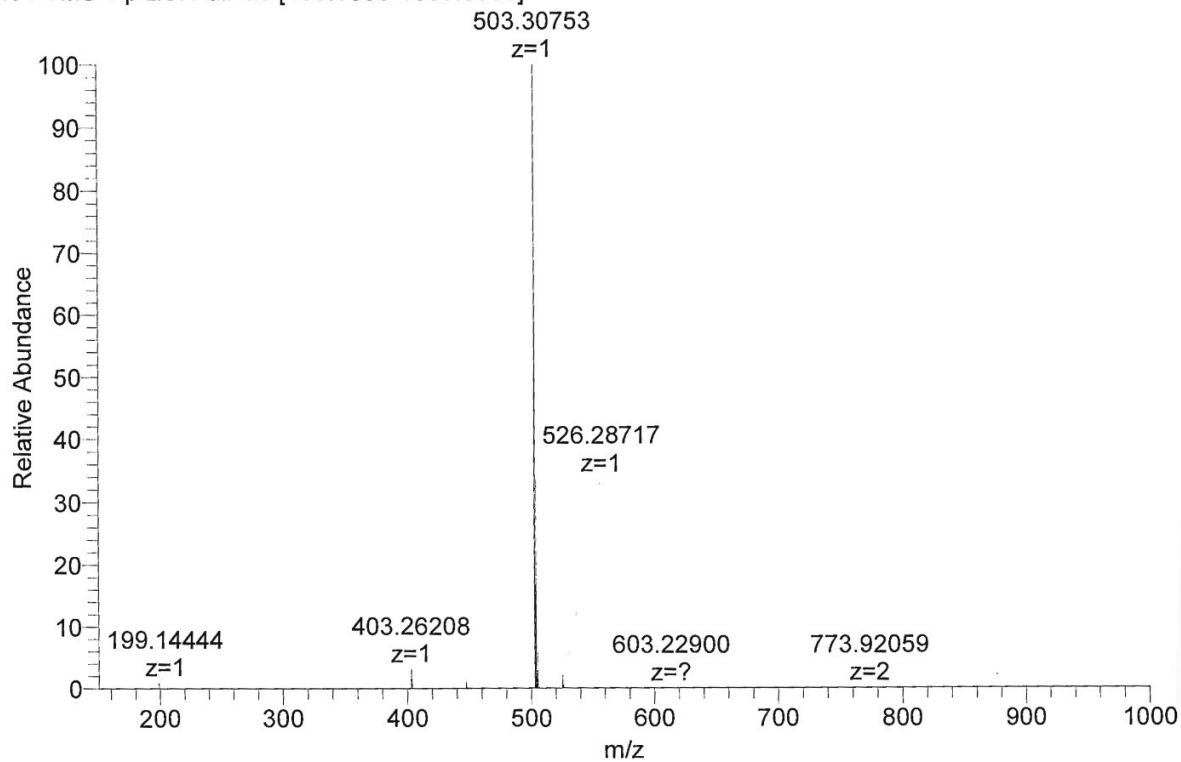Figure S3. HRMS spectrum of compound *trans*-1.

Spectra of *rel*-(3*R*,4*S*)-3-(1*H*-indol-3-yl)-4-(piperazin-1-ylmethyl)-2-propyl-3,4-dihydroisoquinolin-1(2*H*)-one (**2**)

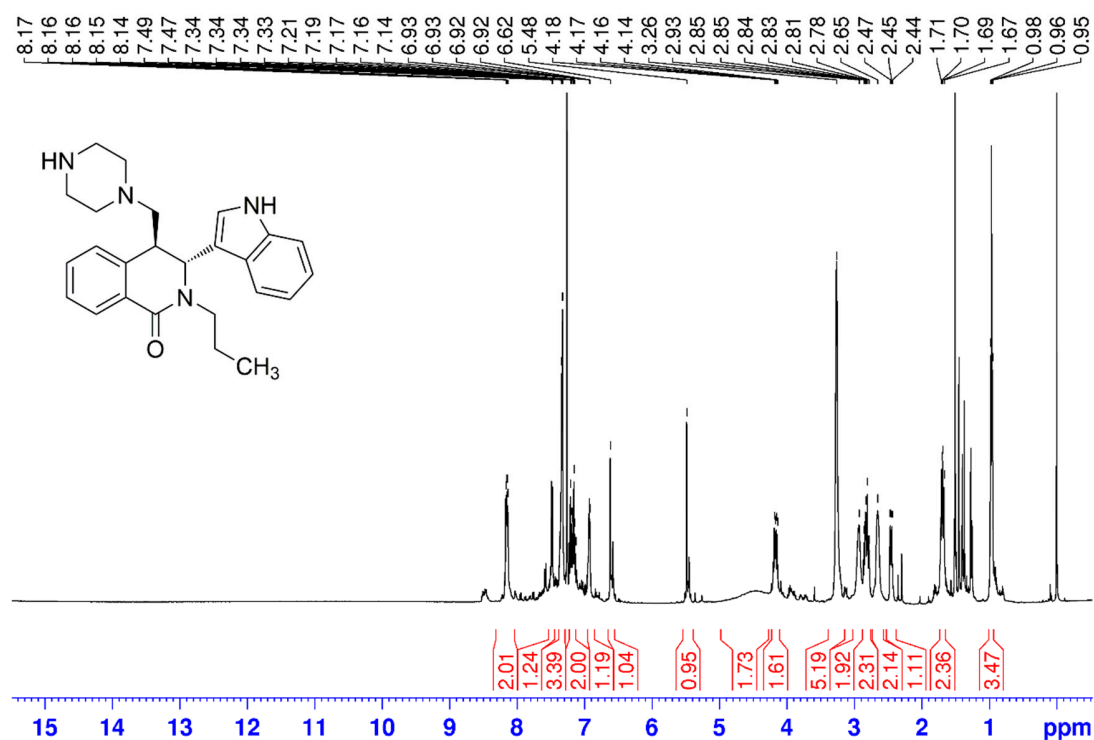

RT: 0.00 - 16.02

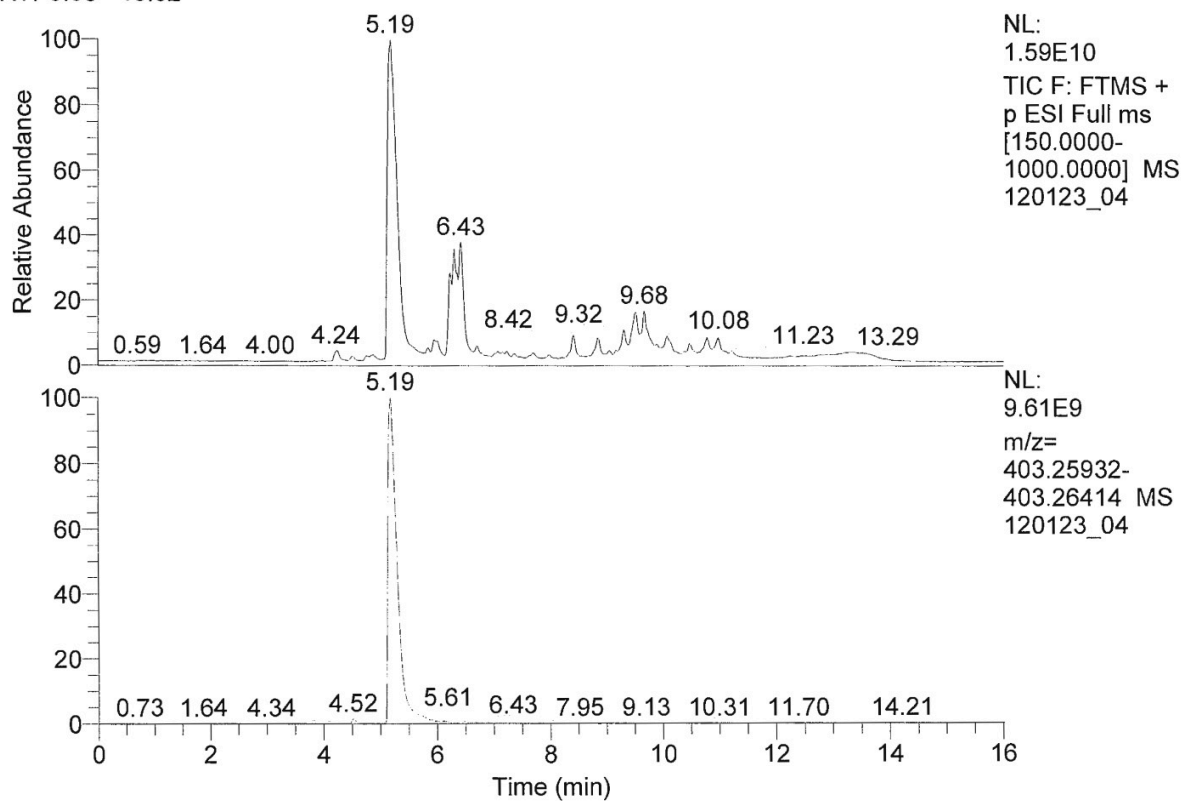

120123\_04 #392 RT: 5.24 AV: 1 NL: 7.32E9  
T: FTMS + p ESI Full ms [150.0000-1000.0000]

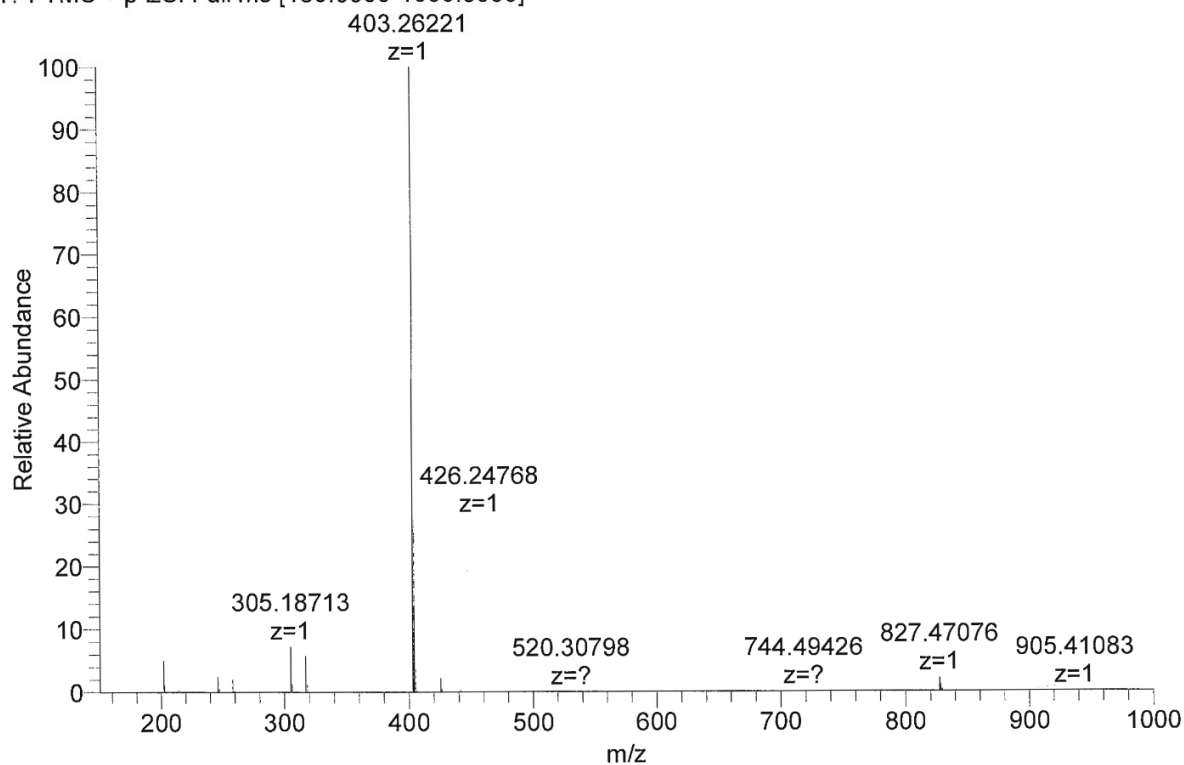Figure S6. HRMS spectrum of compound *trans*-2.

General structure of compounds *trans*-3 - *trans*-9

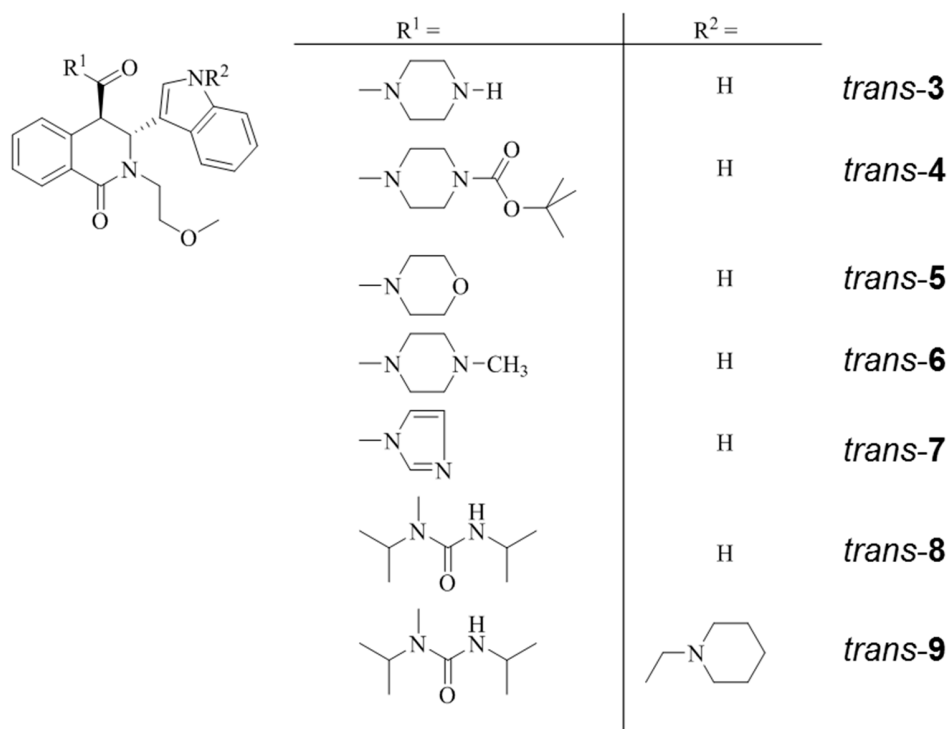

Figure S7. General structure of compounds *trans*-3 - *trans*-9
